# Supplementary material for: Image Processing and Feature Extraction for Hull Structure GMAW Based on Weld Pool Visual Sensing
Source: Hindawi journal article supplement (doi:10.1155/2023/6317992), 2023-01-01
Supplement: f1 [file 6317992.f1.pdf]

## Supplementary Materials-Appendix

Table S1: The coordinate/image of the corner point in the checkboard.

| Calibration | Image           | Calibration | Image           | Calibration | Image           |
|-------------|-----------------|-------------|-----------------|-------------|-----------------|
| (1,1)       | (101.87,155.37) | (2,1)       | (101.26,197.09) | (3,1)       | (100.67,238.84) |
| (1,2)       | (142.65,155.26) | (2,2)       | (142.07,197.13) | (3,2)       | (141.49,239.03) |
| (1,3)       | (183.55,155.10) | (2,3)       | (183.02,197.08) | (3,3)       | (182.51,239.17) |
| (1,4)       | (224.87,154.99) | (2,4)       | (224.39,197.15) | (3,4)       | (223.96,239.34) |
| (1,5)       | (266.48,154.90) | (2,5)       | (266.06,197.15) | (3,5)       | (265.39,239.47) |
| (1,6)       | (308.42,154.86) | (2,6)       | (307.79,197.17) | (3,6)       | (307.37,239.63) |
| (1,7)       | (350.38,154.78) | (2,7)       | (350.00,197.24) | (3,7)       | (349.42,239.80) |
| (1,8)       | (392.66,154.77) | (2,8)       | (392.28,197.28) | (3,8)       | (391.84,239.98) |
| (4,1)       | (100.30,280.76) | (5,1)       | (99.68,322.62)  | (6,1)       | (99.28,364.55)  |
| (4,2)       | (140.92,280.99) | (5,2)       | (140.57,323.00) | (6,2)       | (140.21,365.01) |
| (4,3)       | (182.18,281.33) | (5,3)       | (183.57,323.45) | (6,3)       | (181.22,365.57) |
| (4,4)       | (223.37,281.61) | (5,4)       | (222.93,323.89) | (6,4)       | (222.59,366.12) |
| (4,5)       | (264.99,281.92) | (5,5)       | (264.57,324.26) | (6,5)       | (264.27,366.56) |
| (4,6)       | (306.80,282.37) | (5,6)       | (306.54,324.84) | (6,6)       | (306.14,366.98) |
| (4,7)       | (348.98,282.37) | (5,7)       | (348.57,324.84) | (6,7)       | (348.30,367.52) |
| (4,8)       | (391.36,282.58) | (5,8)       | (390.96,325.21) | (6,8)       | (390.55,367.96) |
