# Supplementary material for: Image Processing and Feature Extraction for Hull Structure GMAW Based on Weld Pool Visual Sensing
Source: Hindawi journal article supplement (doi:10.1155/2023/6317992), 2023-01-01
Supplement: f2 [file 6317992.f2.pdf]

## Supplementary Materials-Test Images

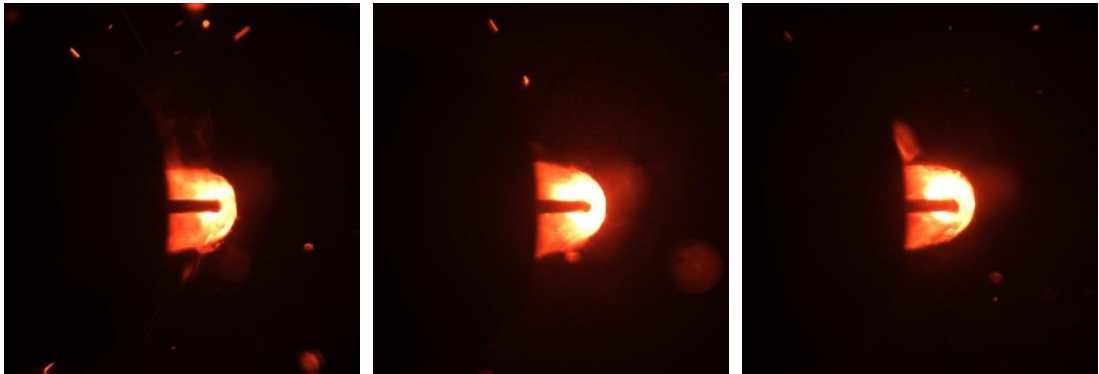

Figure S1: Test images at three typical moments under the process conditions of 95A, 19V, and 23cm/min.

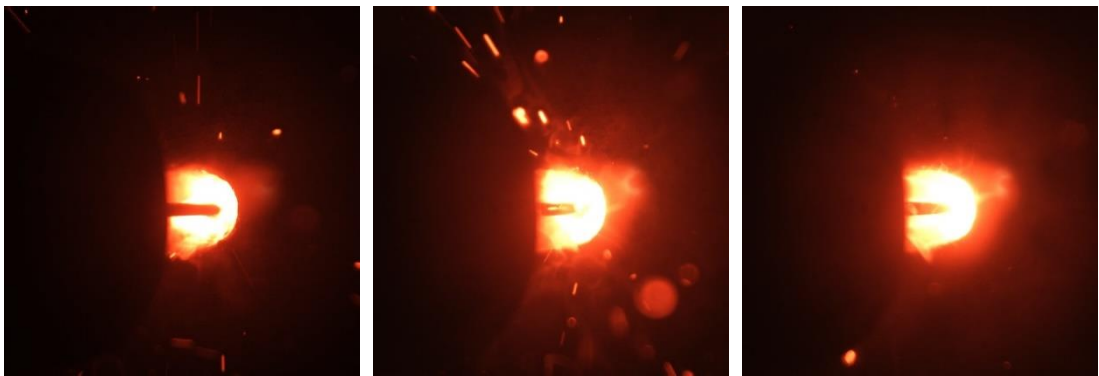

Figure S2: Test images at three typical moments under the process conditions of 95A, 19V, and 26cm/min.

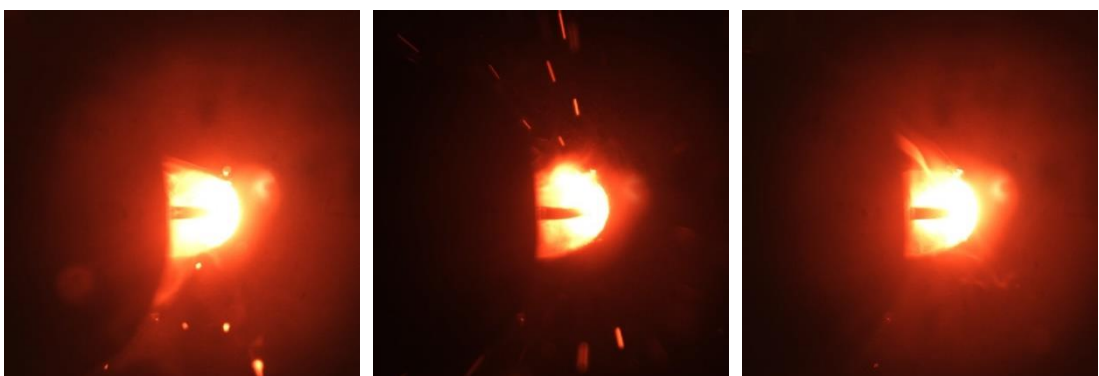

Figure S3: Test images at three typical moments under the process conditions of 125A, 19V, and 26cm/min.

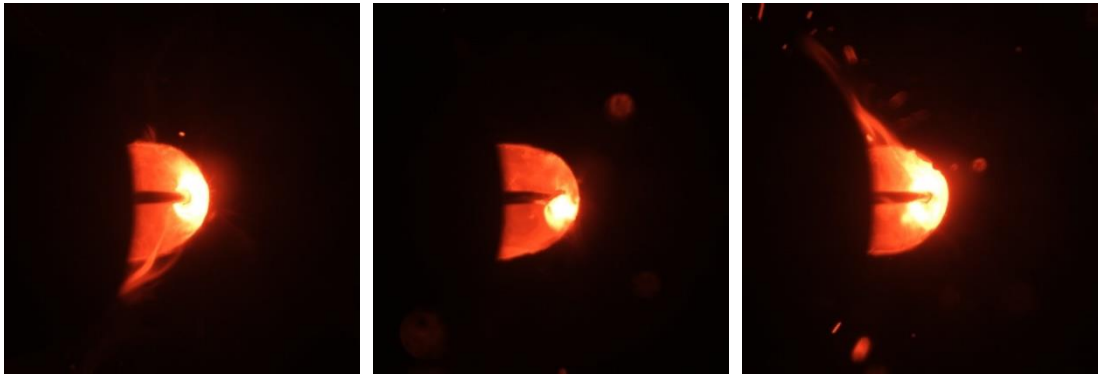

Figure S4: Test images at three typical moments under the process conditions of 125A, 23V, and 23cm/min.

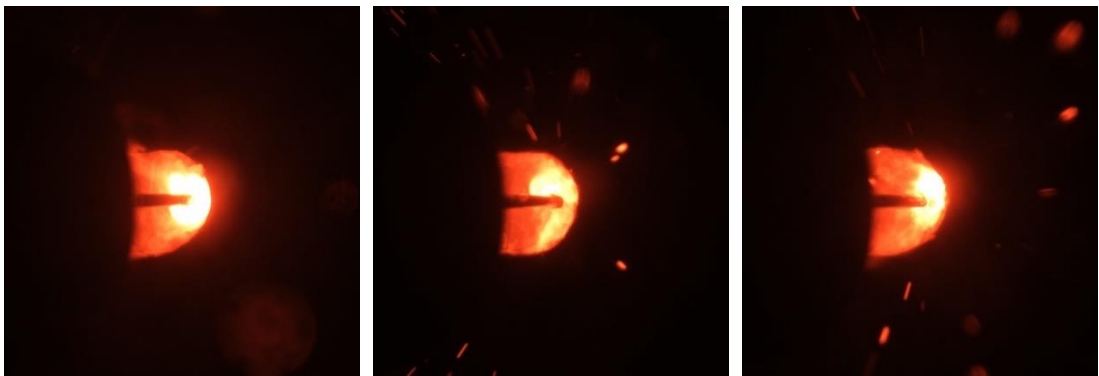

Figure S5: Test images at three typical moments under the process conditions of 145A, 21V, and 29cm/min.

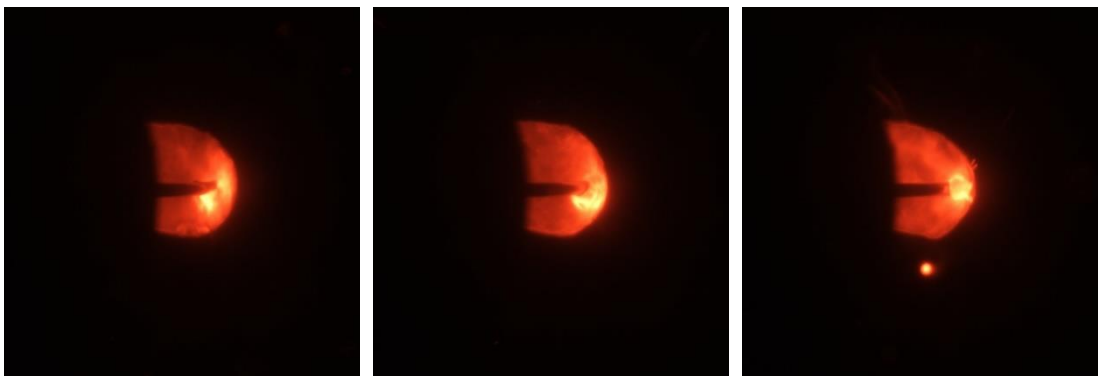

Figure S6: Test images at three typical moments under the process conditions of 145A, 23V, and 21cm/min.

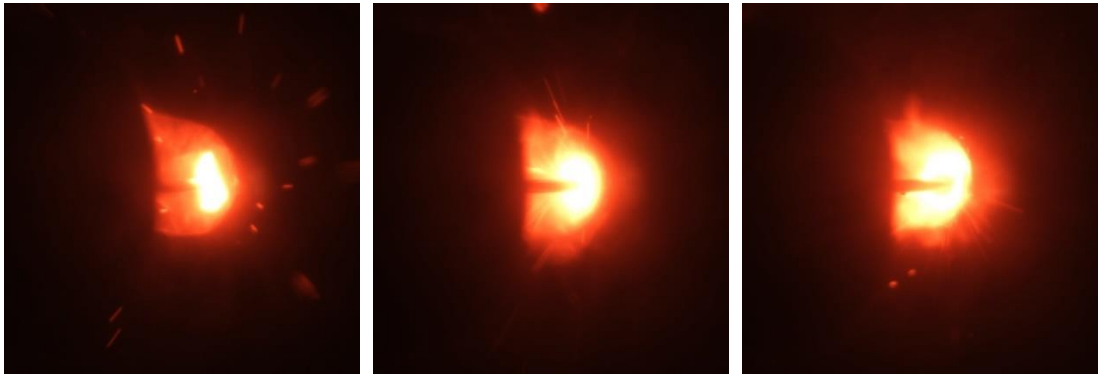

Figure S7: Test images at three typical moments under the process conditions of 150A, 19V, and 26cm/min.

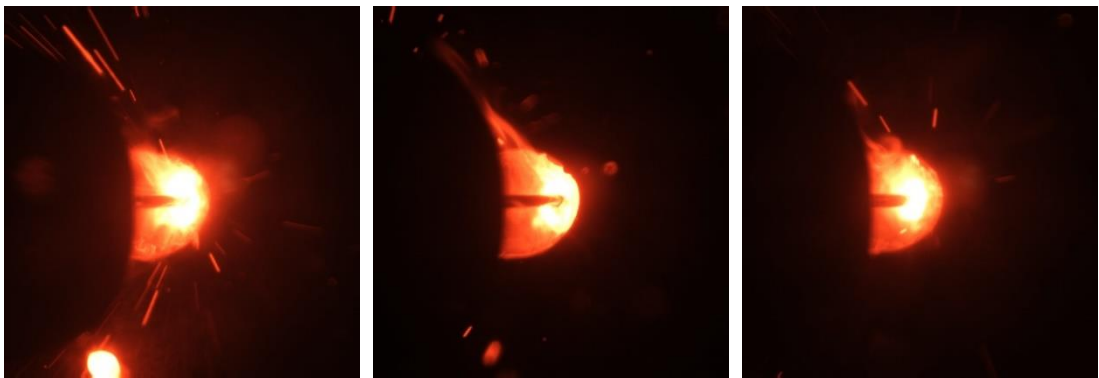

Figure S8: Test images at three typical moments under the process conditions of 150A, 20V, and 26cm/min.

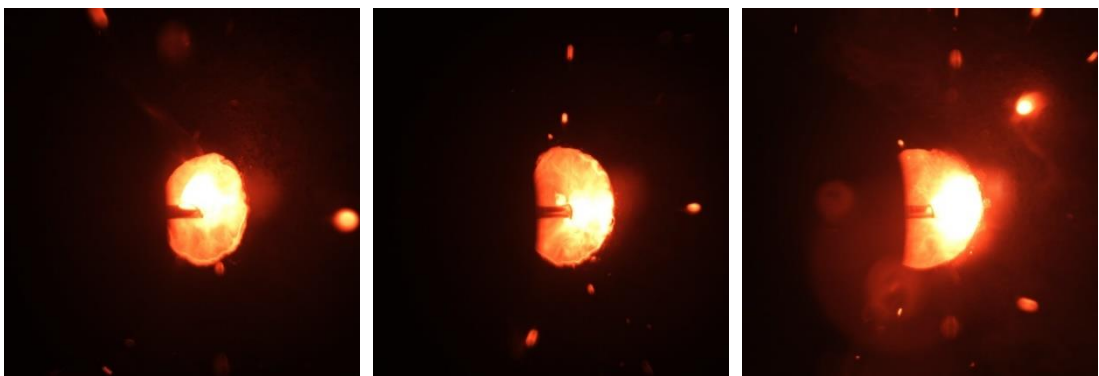

Figure S9: Test images at three typical moments under the process conditions of 150A, 21V, and 23cm/min.

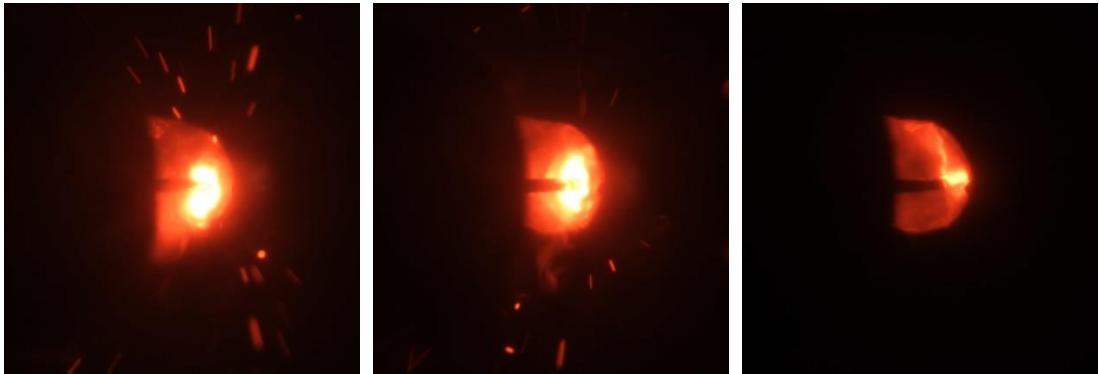

Figure S10: Test images at three typical moments under the process conditions of 150A, 21V, and 26cm/min.

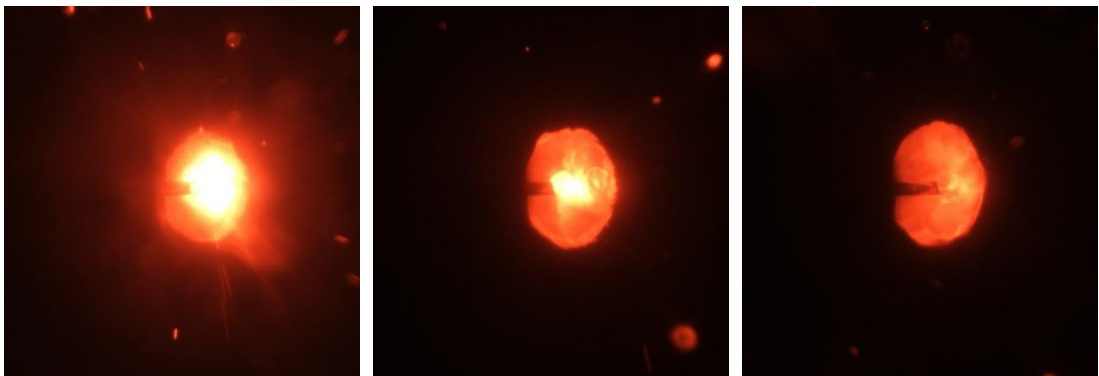

Figure S11: Test images at three typical moments under the process conditions of 150A, 21V, and 29cm/min.

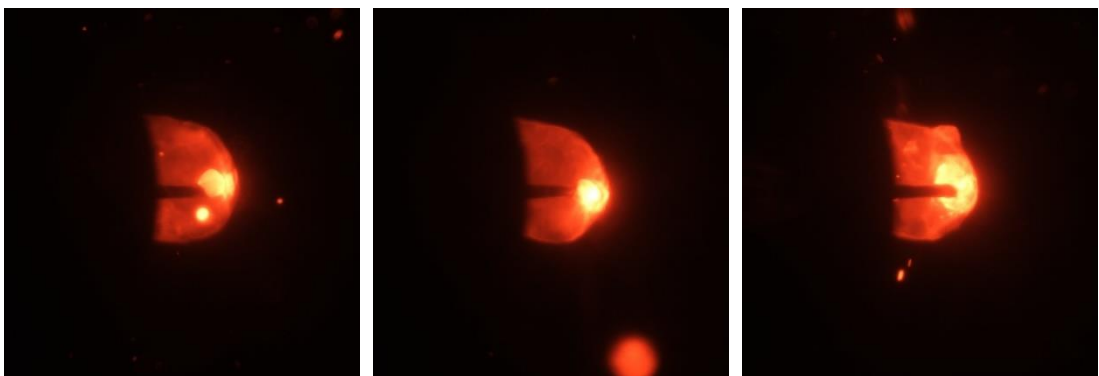

Figure S12: Test images at three typical moments under the process conditions of 150A, 23V, and 26cm/min.
